# Supplementary material
Source: HighWire-hosted journal article supplement (http://www.cmajopen.ca/highwire/filestream/90680/field_highwire_adjunct_files/1/open-2023-0026-1-at.pdf)
Supplement: open-2023-0026-1-at.pdf [file open-2023-0026-1-at.pdf]

Appendix 1: Adjusted associations between sociodemographic factors (excluding education) and vaccination status in adults: The weighted odds of being unvaccinated vs. having at least one dose, all provinces, June 1st 2021 to June 30th 2022

| Predictors                     | Multiple logistic regression without education <sup>a</sup> |         |
|--------------------------------|-------------------------------------------------------------|---------|
|                                | aOR (95% CI)                                                | p-value |
| <b>Overall</b>                 |                                                             |         |
| <b>Collection Period</b>       |                                                             |         |
| June 2021 - August 2021        | <b>2.3 (1.9-2.9)</b>                                        | <0.001  |
| September 2021 - November 2021 | 1.0 (0.8-1.3)                                               | 0.972   |
| November 2021 - February 2022  | <b>0.7 (0.6-1.0)</b>                                        | 0.011   |
| February 2022 - April 2022     | 1.0 (0.8-1.3)                                               | 1.000   |
| April 2022 - June 2022         | Reference                                                   |         |
| <b>Region of Residence</b>     |                                                             |         |
| British Columbia               | <b>1.5 (1.2-1.9)</b>                                        | <0.001  |
| Prairies                       | <b>1.7 (1.4-2.1)</b>                                        | <0.001  |
| Ontario                        | <b>1.4 (1.1-1.7)</b>                                        | <0.001  |
| Quebec                         | 1.1 (0.9-1.4)                                               | 0.505   |
| Atlantic                       | Reference                                                   |         |
| <b>Age Group</b>               |                                                             |         |
| 18-29                          | <b>2.6 (2.0-3.3)</b>                                        | <0.001  |
| 30-39                          | <b>2.6 (2.0-3.2)</b>                                        | <0.001  |
| 40-49                          | <b>2.1 (1.7-2.7)</b>                                        | <0.001  |
| 50-59                          | <b>1.7 (1.3-2.2)</b>                                        | <0.001  |
| 60-69                          | 1.3 (1.0-1.6)                                               | 0.061   |
| 70+                            | Reference                                                   |         |
| <b>Gender</b>                  |                                                             |         |
| Male                           | <b>1.2 (1.0-1.3)</b>                                        | 0.006   |
| Female                         | Reference                                                   |         |
| <b>Population Groups</b>       |                                                             |         |
| First Nations (off-reserve)    | <b>2.1 (1.4-3.2)</b>                                        | <0.001  |
| Métis                          | 1.3 (0.9-2.0)                                               | 0.454   |
| Black                          | <b>1.7 (1.1-2.6)</b>                                        | 0.008   |
| Arab                           | 1.3 (0.7-2.4)                                               | 0.804   |
| Chinese                        | <b>0.6 (0.3-1.0)</b>                                        | 0.042   |
| South Asian                    | <b>0.3 (0.1-0.6)</b>                                        | <0.001  |
| White                          | Reference                                                   |         |

<sup>a</sup> Sample size for the multiple logistic regression is n=63,020.

**Boldface** indicates significant odds ratios at the 5% level.
